# Supplementary material for: Inhibition of itch by neurokinin 1 receptor (Tacr1) -expressing ON cells in the rostral ventromedial medulla in mice
Source: eLife. 2022 Aug 16;11:e69626. doi: 10.7554/eLife.69626 (PMC9381038; doi:10.7554/eLife.69626)
Supplement: Figure 1—source data 1. [file elife-69626-fig1-data1.xlsx]

## Sheet: c
Time (minutes)	SubstanceP								1	1	1	1	1	1	1	1
0									1.25	1.14568	0.934426	0.928571	0.947368	0.333333	1.05974	1.14869
5	1	1	1	1	1	1	1	1
10	1.00694	1.07143	0.875	1.24	1.26	1.23077	1.02041	1	1	0.730864	0.836066	1.25	1.13158	0.666667	1	0.909381
15									0.777778	0.997531	0.688525	0.678571	0.868421	0.666667	1.03896	1.02904
20	1.09375	2.47619	1.5	0.98	1.065	1.92308	1.28571	5	0.5	0.938272	0.688525	0.964286	0.868421	0.333333	1.07792	0.997128
25	1.16898	2.61905	1.125	1.22	1.26	1	1.33163	4	0.444444	0.894815	0.622951	0.857143	0.921053	0.333333	0.753247	0.350989
30	1.29861	2.28571	1.625	1.42	1.46	1.61539	1.34694	4	1.66667	1.16543	0.704918	0.821429	1.05263	0.333333	0.945454	1.21251
35	1.4294	2.38095	2	0.78	0.945	1.92308	1.32945	3	1.22222	0.977778	0.622951	0.535714	0.973684	0.666667	0.976623	1.1806
40	1.59722	1.71429	1	1.28	1.3	2.61538	1.31195	7	1.33333	1.24444	0.557377	0.821429	1.18421	0.666667	0.87013	1.05935
45	1.29167	1.80952	1.375	1.16	1.16	4.38462	1.36735	2	0.777778	1.12593	0.57377	0.75	1.13158	1.33333	0.81039	1.44225
50	1.34722	1.42857	1.75	1.04	1.08667	2.84615	1.26531	2	1.11111	1.37284	0.508197	0.928571	0.789474	0.333333	0.945454	1.3529
55	1.31944	1.38095	2	1.1	1.12	3	1.35569	1
60	1.57986	1.04762	1.375	1.24	1.38	3.23077	1.42857	6
65									1.4	0.997531	0.360656	1.39286	0.726316	0.333333	0.727273	1.13593
70
75	1.49306	0.714286	2.625	1.24	1.28	2.61538	1.72653	7

## Sheet: f
Mouse	Saline	SSP (0.5ul, 10nM)
1M	37	61.5
2M	270.5	166
3M	84	1.5
5M	165	84
6M	190	125.5
5F	22	8
6F	66	50
7F	55	20
9F	66	21

## Sheet: g
Mouse	Saline	SSP (0.5ul, 10nM)
1M	86.5	5.5
2M	80.5	11.5
3M	226.5	24.5
5M	196.5	72
6M	193.5	4.5
2M	1	21
6F	92	0
7F	1	55
9F	49	4

## Sheet: h
Mouse	Saline	SSP (0.5ul, 10nM)
1M	6.68333	4.815
2M	6.10833	3.835
3M	5.77333	4.56333
5M	5.155	4.03667
6M	5.19667	3.09167
2M	5.77667	3.43333
5F	4.31	2.97167
6F	3.2175	1.28667
7F	3.29167	2.19833
9F	3.04	2.29333

## Sheet: i
Mouse	Saline	SSP (0.5ul, 10nM)
1M	7.29075	6.731
2M	5.847	8.113
3M	3.72	2.89292
5M	5.828	3.79
6M	6.062	2.75075
2M	6.271	5.414
6F	3.573	3.651
9F	3.576	4.186
