# Supplementary material for: Inhibition of itch by neurokinin 1 receptor (Tacr1) -expressing ON cells in the rostral ventromedial medulla in mice
Source: eLife. 2022 Aug 16;11:e69626. doi: 10.7554/eLife.69626 (PMC9381038; doi:10.7554/eLife.69626)
Supplement: Figure 2—source data 1. [file elife-69626-fig2-data1.xlsx]

## Sheet: d
Mouse	NK-1R/mCherry
94	0.611111
97	0.916667
99	1
114	0.833333
128	0.524573
7	1
13	1
Cell Counts:
Mouse	Vector	Slice	Number DREADDs	NK-1R positive	%Positive
94	ControlV	1a	5	5	1
		1b	6	5	0.833333
		1d	3	0	0
					0.611111
97	ControlV	1d	12	9	0.75
		1e	4	4	1
		2a	7	7	1
					0.916667
99	ControlV	1a	15	15	1
		1b	4	4	1
		1c	5	5	1
		2b	10	10	1
					1
114	ControlV	1a	2	2	1
		1b	4	2	0.5
		2a	4	4	1
					0.833333
128	ControlV	1a	3	1	0.333333
		2a	8	5	0.625
		3a	13	8	0.615385
					0.524573
7	DREADDs	1a_1_50_100x_2018	4	4	1
13	DREADDs	13TdTom_40x_Stack_secondattempt	13	13	1
