# Supplementary material for: Inhibition of itch by neurokinin 1 receptor (Tacr1) -expressing ON cells in the rostral ventromedial medulla in mice
Source: eLife. 2022 Aug 16;11:e69626. doi: 10.7554/eLife.69626 (PMC9381038; doi:10.7554/eLife.69626)
Supplement: Figure 3—figure supplement 1—source data 1. [file elife-69626-fig3-figsupp1-data1.xlsx]

## Sheet: a
Baseline		CNO
Control	hM3dq	Control	hM3dq
153	129	108	135
208	127	107	258
226	136	152	34
182	119	149	19
151	99	133	21
118	98	141	51
105	140	149	28
	112		65
	108		71
	80		50
	123		56
	114		55
	198		52
	114		104

## Sheet: b
Baseline		CNO
Control	hM3dq	Control	hM3dq
3	15	16	0
23	7	30	9
2	0	21	7
58	12	27	0
45	39	24	0
25	15	25	10
32	9	36	2
1	14	0	0
7	0	0	0
12	24	38	0
0	16	10	8
	12		0
	5		3
	8		0

## Sheet: c
Baseline		CNO
Control	hM3dq	Control	hM3dq
0.595481	0.683548	0.4887	0.737275
1.18674	0.942832	1.46104	0.255451
1.05178	1.26701	1.00586	0.322198
0.981012	1.18674	0.89784	0.559867
0.568128	1.31089	0.595481	0.883905
0.840896	0.800732	1.24012	0.464798
1.46104	0.981012	1.13963	0.505764
	1.14301		0.538817
	1.24012		0.840896
	1.36403		0.319313
	1.18674		1.46104
	0.962696		0.958201
	0.974874		0.831014
	1.30132		0.378734

## Sheet: d
Baseline		CNO
Control	hM3dq	Control	hM3dq
11.1975	7.355	6.8225	4.82
10.515	12.785	5.25	3.01
8.4525	13.2975	15.55	6.695
6.665	6.555	3.34	7.6175
17.4475	15.4325	10.27	4.895
10.775	4.105	15.7975	5.17
7.54	8.8925	5.62	5.26
7.04	9.365	5.2925	7.9375
5.1	7.38	6.1575	9.1525
7.1925	8.94	7.2075	8.0675
	7.59		5.7175
	7.5025		7.285
	9.47		7.8775
	4.4825		6.105
