# Supplementary material for: Inhibition of itch by neurokinin 1 receptor (Tacr1) -expressing ON cells in the rostral ventromedial medulla in mice
Source: eLife. 2022 Aug 16;11:e69626. doi: 10.7554/eLife.69626 (PMC9381038; doi:10.7554/eLife.69626)
Supplement: Figure 3—figure supplement 2—source data 1. [file elife-69626-fig3-figsupp2-data1.xlsx]

## Sheet: a
Saline	Low Dose	High Dose
87.5	73	59
20.5	101.5	89
48.5	21	4.5
194.5	99.5	44.5
20.5	45.5	72
15.5	18.5	15
17	19.5	29
23.5	48.5	31.5
19	7	15.5
81	10.5	14
28	49.5	19.5
44	78	28

## Sheet: b
Saline	Low Dose	High Dose
86.5	15	240
9	74	59.5
17	196	167.5
10	61	40
23.5	68	5.5
206	70.5	65
73	89	49
0	34	129

## Sheet: c
Saline	Low Dose	High Dose
5.02167	6.29333	5.27667
5.50667	6.24833	9.215
8.45333	8.73333	8.695
7.335	5.53333	7.33
4.91333	6.15833	7.02833
6.50333	8.29167	6.56
6.27167	7.46	6.23167
6.27167	5.345	4.91167
5.22333	7.15333	5.76333
5.2	5.64	5.37333
6.29667	5.87333	6.43333
5.75833	5.34667	5.87

## Sheet: d
Saline	Low Dose	High Dose
5.94333	5.485	4.175
5.37667	4.78833	4.455
4.91833	5.22667	6.24
5.64833	5.205	5.185
5.41667	5.67833	4.46333
6.445	6.40333	3.795
4.70667	6.45833	5.25333
4.555	5.55167	3.28833
4.415	3.27833	3.67833
3.99667	4.15167	4.83167
5.82667	6.29333	4.495
6.33333	3.68833	4.62333
