# Supplementary material for: Inhibition of itch by neurokinin 1 receptor (Tacr1) -expressing ON cells in the rostral ventromedial medulla in mice
Source: eLife. 2022 Aug 16;11:e69626. doi: 10.7554/eLife.69626 (PMC9381038; doi:10.7554/eLife.69626)
Supplement: Figure 3—figure supplement 3—source data 1. [file elife-69626-fig3-figsupp3-data1.xlsx]

## Sheet: a
	Male					Female
Saline	37	270.5	84	165	190	22	66	55	66
SP	61.5	166	1.5	84	125.5	8	50	20	21

## Sheet: b
	Male						Female
Saline	86.5	80.5	226.5	196.5	193.5	1	92	1	49
SP	5.5	11.5	24.5	72	4.5	21	0	55	4

## Sheet: c
	Male						Female
Saline	7.29075	5.847	3.72	5.828	6.062	6.271	3.573	3.576
SP	6.731	8.113	2.89292	3.79	2.75075	5.414	3.651	4.186

## Sheet: d
	Male						Female
Saline	6.68333	6.10833	5.77333	5.155	5.19667	5.77667	4.31	3.2175	3.29167	3.04
SP	4.815	3.835	4.56333	4.03667	3.09167	3.43333	2.97167	1.28667	2.19833	2.29333

## Sheet: e
	Male					Female
Saline	80.5	55	138	129	57.5	62	15	53.5	70.5	33	14	18.5	60.5	43.5
Clozapine	4.5	0	0	0	0	36.5	0	0	52.5	32	28	0	47.5	5.5

## Sheet: f
	Male						Female
Saline	153.5	135.5	116.5	222.5	207	178	58	149	140	213.5	80	124.5	262.5	201.5	206
Clozapine	112	0	0	0	119.5	0	128.5	0	0	186.5	80	86	0	85	17.5

## Sheet: g
	Male						Female
Saline	8.035	5.85167	4.47333	6.965	6.711	6.208	4.71167	6.17167	1.19	5.474	4.992	5.577	4.671	6.205	5.999
Clozapine	5.14833	8.33667	2.18167	5.57167	6.663	7.109	3.17	4.955	3.28833	6.896	7.241	5.413	6.79	4.595	6.791

## Sheet: h
	Male						Female
Saline	8.035	5.85167	4.47333	6.965	6.711	6.208	4.71167	6.17167	1.19	5.474	4.992	5.577	4.671	6.205	5.999
Clozapine	5.14833	8.33667	2.18167	5.57167	6.663	7.109	3.17	4.955	3.28833	6.896	7.241	5.413	6.79	4.595	6.791

## Sheet: i
	Male						Female
Saline	49.5	37.5		14	47	68.5	86.5	136.5	76	90
Clozapine	27	81		31	44	84	87	42.5	87	62

## Sheet: j
	Male						Female
Saline	57	146	84	82	41	201.5	52.5	23.5	75	216.5
Clozapine	60.5	98	47.5	83	66	312	73	125	94	170

[truncated: 2 more sheets: k, l]
