# Supplementary material for: Inhibition of itch by neurokinin 1 receptor (Tacr1) -expressing ON cells in the rostral ventromedial medulla in mice
Source: eLife. 2022 Aug 16;11:e69626. doi: 10.7554/eLife.69626 (PMC9381038; doi:10.7554/eLife.69626)
Supplement: Figure 3—source data 1. [file elife-69626-fig3-data1.xlsx]

## Sheet: c
hM3Dq		Control Vector
Saline	Clozapine	Saline	Clozapine
62	36.5	86.5	87
15	0	136.5	42.5
53.5	0	76	87
80.5	4.5	90	62
55	0	49.5	27
138	0	37.5	81
129	0
70.5	52.5	14	31
33	32	47	44
14	28	68.5	84
18.5	0
60.5	47.5
43.5	5.5
57.5	0

## Sheet: d
hM3Dq		Control Vector
Saline	Clozapine	Saline	Clozapine
58	128.5	52.5	73
149	0	23.5	125
140	0	75	94
153.5	112	216.5	170
135.5	0	57	60.5
116.5	0	146	98
222.5	0	84	47.5
213.5	186.5	82	83
80	80	41	66
124.5	86	201.5	312
262.5	0
201.5	85
206	17.5
207	119.5
178	0

## Sheet: e
hM3Dq		Control Vector
Saline	Clozapine	Saline	Clozapine
4.71167	3.17	5.902	5.847
6.17167	4.955	7.028	5.671
1.19	3.28833	6.169	5.04
8.035	5.14833	4.11	5.434
5.85167	8.33667	2.669	3.7655
4.47333	2.18167	5.126	5.319
6.965	5.57167	4.272	4.535
5.474	6.896	3.42	5.349
4.992	7.241	3.51	4.167
5.577	5.413	5.212	4.451
4.671	6.79
6.205	4.595
5.999	6.791
6.711	6.663
6.208	7.109

## Sheet: f
hM3Dq		Control Vector
Saline	Clozapine	Saline	Clozapine
3.16125	2.66	2.85	3.879
3.55667	2.30375	3.394	4.366
2.78833	8.34167	3.383	3.367
5.78875	3.2	3.454	4.59067
4.53875	4.33667	5.329	4.394
3.47333	8.8625	3.543	3.217
4.10667	9.12875	3.517	4.752
7.008	8.023	4.386	3.074
6.272	6.044	4.151	3.398
5.071	3.076	3.176	2.332
5.205	7.554
5.717	5.07
5.381	4.634
4.11	5.089
4.849	5.48
