# Supplementary material for: Inhibition of itch by neurokinin 1 receptor (Tacr1) -expressing ON cells in the rostral ventromedial medulla in mice
Source: eLife. 2022 Aug 16;11:e69626. doi: 10.7554/eLife.69626 (PMC9381038; doi:10.7554/eLife.69626)
Supplement: Figure 4—source data 1. [file elife-69626-fig4-data1.xlsx]

## Sheet: a
Day	DREADDs Pre CLZ								DREADDs Post CLZ										Control Vector Pre CLZ										Control Vector Post CLZ
0	2.5	9.5	0	16.5	1	31	6.5	17.5											3	5.5	12.5	83	3.5	6.5	6	6	2.5	22
1	4	49	4	1.5	0	0	0	7											34	9	4.5	62.5	4	71	52.5	5.5	11.5	5
3	6.5	2.5	1.5	0	87.5	106	40	91.5	1.5	0	0	0	94	53	0	0			51	16	18	94	10.5	185	118	89.5	16	38.5	42.5	14.5	21.5	75.5	3	0	47.5	31
5	37	6	4	10	24	10	10	37	9	4	0	2	7	15	5	0			79.5	14	12	63	6.5	40.5	49.5	29			120.5	22.5	28	79.5	8	98.5	31.5	8

## Sheet: b
Pre	Post CLZ
37	9
6	4
4	0
10	2
24	7
10	15
10	5
37	0

## Sheet: c
Saline	Clozapine
79.5	120.5
14	22.5
12	28
63	79.5
6.5	8
40.5	98.5
49.5	31.5
29	8

## Sheet: d
Day	DREADDs Pre CLZ								DREADDs Post CLZ										Control Vector Pre CLZ										Control Vector Post CLZ
0	0	0	0	1	0	0	0	0											0	0	0	0	0	0	0	0	0	1
1	1	1	0	3	2	2	2	1											0	0	2	0	1	2	0	1	2	1
3	3	3	1	3	2	2	2	2	1	1	0	1	0	2	0	0	0	0	0	1	1	2	2	1	1	2	2	1	0	1	2	2	3	1	2	0	2	1
5	2	3	1	0	3	3	2	3	1	0	1	3	0	0	0	0	0	0	1	1	1	0	1	1	1	1	2	1	1	1	2	1	0	2	2	1	1	2

## Sheet: e
Pre	Post CLZ
3	1
3	1
1	0
3	1
2	0
2	2
2	0
2	0

## Sheet: f
pre	post CLZ
0	0
1	1
1	2
2	2
2	3
1	1
1	2
2	0
2	2
1	1
