# Supplementary material for: Inhibition of itch by neurokinin 1 receptor (Tacr1) -expressing ON cells in the rostral ventromedial medulla in mice
Source: eLife. 2022 Aug 16;11:e69626. doi: 10.7554/eLife.69626 (PMC9381038; doi:10.7554/eLife.69626)
Supplement: Figure 5—figure supplement 1—source data 1. [file elife-69626-fig5-figsupp1-data1.xlsx]

## Sheet: a
Excited
2hz	0.864865	2.05128	0.77551	1.30233	2.23529	1.56098	0.117647	1.86207	0.6	0.347826	1	0.789474	1.09091	1.05	1	1.5	0.785714	0.941176
5hz	0.836364	2.525	0.931818	0.960526		0.964286	0.414634	1.82353	0.413793	0.289855	0.965517	0.84375	1.25806	0.86	0.853659	1.17647	0.454545	1.0625
20hz	0.15534	1.15139	0.230216	0.127778			0.870504	0.769231	0.120879	0	0.619718	0.517647	1.04	0.868852		1.17857	0.468085	0.566038
	Inhibited
2hz	0.0434783
5hz	0.0449438
20hz	0
	No Response
2hz	0.0810811
5hz	0.0512821
20hz	0.00549451

## Sheet: b
Inhibited
2hz	0.222222	0	0.285714	0.0454546	0.142857	0	0.0666667
5hz	0.296296	0.121212	0.0350877	0.0204082	0.0277778	0	0.153846
20hz	0.00346021		0		0		0.113636
No Response
2hz	0.0666667	0.264706	0.235294	0.206897	0.117647	0.2	0.142857
5hz	0.153846	0.366197	0.133333	0.25	0.0566038	0.434783	0.0263158
20hz	0.113636		0.146199	0.289157		0.451429	0.139535

## Sheet: c
	Excited
2hz	1	2.2	0.909091
5hz	1	1.96154	1.1
20hz	0.71875	1.97872	1.50617
