# Supplementary material for: Inhibition of itch by neurokinin 1 receptor (Tacr1) -expressing ON cells in the rostral ventromedial medulla in mice
Source: eLife. 2022 Aug 16;11:e69626. doi: 10.7554/eLife.69626 (PMC9381038; doi:10.7554/eLife.69626)
Supplement: Figure 5—figure supplement 2—source data 1. [file elife-69626-fig5-figsupp2-data1.xlsx]

## Sheet: Sheet1
ON Cell-Excited
Baseline	1.85437	6.6	2.82	1.61702	0.777778	0	0.25	0.0909091	3.01695	0	1.23333	1.15517	5.96591	0	11.6724	3	0.369231	0.490909
Pinch	7.57143	15	7	11	12	9	8	6	10.6667	3.66667	4	3	8.2	0.5	15.3333	10.1429	8.8	1.25
2hz	2.42105	9.85	5.48	3.36364	9.05882	3.47619	0.352941	3.93333	4	1	2.11111	1.9	8.75	1.90909	14.5455	4	1.42857	1.88889
5hz	4.27273	11.375	9.55556	5.1875		5.08333	2.11765	8.63636	4.16667	1.42857	4.66667	4.14286	11.8571	4.09091	12.8889	6	2.14286	5.42857
20hz	3.09091	23.9231	5.28571	6.28571			17	14.4	5.6	0	11	9	21.7143	15.5714		14.5	7	10.6667
ON Cell-Inhibited
Baseline	6.5
Pinch	10.75
2hz	0.916667
5hz	1.55556
20hz	0
ON Cell-No Response
Baseline	0.136364	0.31579	10.2647	1.52857	0.0243902
Pinch	11.8	5	13.5	13.0909	1.36364
2hz	0.631579	0.285714	10.5556	0.166667	0
5hz	0.25	2.33333	12	0	0
20hz	0.1		11	0	0
OFF Cell-Inhibited
Baseline	12.3333	13	7.9697	4.66667	6.84483	16.7188	10.15
Pinch	0.333333	5.5	0	3.33333	0.875	9.66667	5.5
2hz	5.2	15.7857	5.09091	2.18182	5.85714	2.81818	1.25
5hz	3.53333	3	1	1.2	3.25	1.66667	5.66667
20hz	0.666667		0.9		1	1	1.25
OFF Cell-No Response
Baseline	7.05882	7.78125	3.68182	12.2022	11.4429	16.791	5.78873
Pinch	0.416667	0.666667	0	1.2	4.625	1.66667	0.294118
2hz	10.125	8.6875	3.88889	11.7333	8.33333	16.5	3.42857
5hz	11	12.6	3.55556	14	3.81818	19.1	5.5
20hz	10.3333		5.88889	17.5		20.8889	4
Neutral Cell-Excited
Baseline	0.0357143	0	0
Pinch	0	0	0
2hz	1.85714	4.2	1.72727
5hz	4.25	8.5	12.25
20hz	14.6667	31	45.4
