# Supplementary material for: Inhibition of itch by neurokinin 1 receptor (Tacr1) -expressing ON cells in the rostral ventromedial medulla in mice
Source: eLife. 2022 Aug 16;11:e69626. doi: 10.7554/eLife.69626 (PMC9381038; doi:10.7554/eLife.69626)
Supplement: Figure 5—figure supplement 3—source data 1. [file elife-69626-fig5-figsupp3-data1.xlsx]

## Sheet: Sheet1
Time (s)	Cell1	Cell2	Cell3	Cell4	Cell5	Cell6	Cell7	Cell8	Cell9	Cell10	Cell11	Cell12	Cell13	Cell14	Cell15
0	0	0	0	0	0	0	0	0	0	0.066667	0	0	0	0	0
0.001	0	0	0	0	0.011236	0	0	0	0	0	0.032258	0	0	0.030303	0
0.002	0	0	0	0	0	0	0.25	0	0	0.066667	0.096774	0	0.115385	0.090909	0
0.003	0	0	0.02439	0	0	0	0.75	0.018182	0.111111	0	0.193548	0	0.076923	0.272727	0
0.004	0	0.0631579	0.02439	0.013889	0	0	0	0.163636	0.388889	0.266667	0.16129	0	0.076923	0.151515	0
0.005	0	0.0421053	0	0	0.11236	0.0625	0	0.127273	0.166667	0.466667	0.064516	0	0.115385	0.090909	0
0.006	0.15625	0.157895	0	0	0.146067	0.265625	0	0.036364	0.222222	0	0.16129	0.333333	0.038462	0.030303	0
0.007	0.1875	0.0315789	0.02439	0	0.05618	0.15625	0	0.036364	0.055556	0	0	0.47619	0.192308	0.030303	0
0.008	0.25	0.0631579	0	0.013889	0.044944	0.03125	0	0.218182	0	0.133333	0	0	0.038462	0.060606	0.0625
0.009	0.1875	0.0421053	0.073171	0.027778	0.089888	0.0625	0	0.145455	0	0	0.032258	0	0.153846	0.151515	0.1875
0.01	0.1875	0.0842105	0.268293	0.222222	0.168539	0.046875	0	0.072727	0	0	0	0.142857	0.038462	0.090909	0.125
0.011	0.03125	0.210526	0.097561	0.222222	0.101124	0.078125	0	0.036364	0	0	0	0	0	0	0.1875
0.012	0	0.0210526	0.073171	0.125	0.05618	0.125	0	0.072727	0	0	0	0	0	0	0
0.013	0	0.0315789	0.146341	0.041667	0.05618	0.125	0	0.036364	0	0	0	0	0	0	0.125
0.014	0	0.136842	0.097561	0.013889	0.033708	0.015625	0	0.036364	0	0	0	0	0	0	0
0.015	0	0.0526316	0.073171	0.069444	0.067416	0	0	0	0	0	0	0	0	0	0.1875
0.016	0	0.0105263	0.073171	0.041667	0.033708	0.03125	0	0	0	0	0	0	0	0	0
0.017	0	0	0	0.055556	0	0	0	0	0	0	0	0.047619	0	0	0.0625
0.018	0	0	0	0.027778	0	0	0	0	0	0	0.032258	0	0	0	0
0.019	0	0	0	0.055556	0.011236	0	0	0	0	0	0	0	0	0	0.0625
0.02	0	0	0	0.027778	0	0	0	0	0	0	0	0	0	0	0
0.021	0	0	0	0	0	0	0	0	0.055556	0	0	0	0	0	0
0.022	0	0	0	0	0	0	0	0	0	0	0	0	0.038462	0	0
0.023	0	0	0.02439	0.041667	0	0	0	0	0	0	0	0	0	0	0
0.024	0	0	0	0	0	0	0	0	0	0	0	0	0	0	0
0.025	0	0	0	0	0	0	0	0	0	0	0	0	0	0	0
0.026	0	0.0105263	0	0	0	0	0	0	0	0	0	0	0	0	0
0.027	0	0	0	0	0	0	0	0	0	0	0	0	0	0	0
0.028	0	0	0	0	0	0	0	0	0	0	0.032258	0	0.038462	0	0
0.029	0	0	0	0	0	0	0	0	0	0	0	0	0	0	0
0.03	0	0	0	0	0	0	0	0	0	0	0.032258	0	0	0	0
0.031	0	0.0105263	0	0	0	0	0	0	0	0	0	0	0	0	0
0.032	0	0	0	0	0	0	0	0	0	0	0	0	0	0	0
0.033	0	0.0105263	0	0	0	0	0	0	0	0	0	0	0	0	0
0.034	0	0	0	0	0	0	0	0	0	0	0	0	0	0	0
0.035	0	0	0	0	0	0	0	0	0	0	0	0	0	0	0
0.036	0	0	0	0	0	0	0	0	0	0	0	0	0	0	0
0.037	0	0	0	0	0	0	0	0	0	0	0	0	0	0	0
0.038	0	0.0105263	0	0	0	0	0	0	0	0	0.032258	0	0	0	0
0.039	0	0	0	0	0	0	0	0	0	0	0	0	0.038462	0	0
0.04	0	0	0	0	0	0	0	0	0	0	0	0	0	0	0
0.041	0	0	0	0	0	0	0	0	0	0	0	0	0	0	0
0.042	0	0	0	0	0	0	0	0	0	0	0.032258	0	0.038462	0	0
0.043	0	0	0	0	0	0	0	0	0	0	0	0	0	0	0
0.044	0	0	0	0	0	0	0	0	0	0	0	0	0	0	0
0.045	0	0	0	0	0	0	0	0	0	0	0	0	0	0	0
0.046	0	0	0	0	0	0	0	0	0	0	0	0	0	0	0
0.047	0	0	0	0	0.011236	0	0	0	0	0	0	0	0	0	0
0.048	0	0	0	0	0	0	0	0	0	0	0.096774	0	0	0	0
0.049	0	0.0105263	0	0	0	0	0	0	0	0	0	0	0	0	0
